# Supplementary material
Source: HighWire-hosted journal article supplement (https://jnm.snmjournals.org/highwire/filestream/105298/field_highwire_adjunct_files/0/263200_Supplemental_Table.pdf)
Supplement: 263200_Supplemental_Table.pdf [file 263200_Supplemental_Table.pdf]

## Supplementary Table. Human TSPO PET Studies

| Pathology                  | Year                 | TSPO<br>PET Tracer | A-line | Additional<br>PET Tracers | Cohort      | Subject<br>N | Age<br>Mean | Men/<br>Woman |
|----------------------------|----------------------|--------------------|--------|---------------------------|-------------|--------------|-------------|---------------|
| <b>Aging</b>               |                      |                    |        |                           |             |              |             |               |
| Kumar et al.               | <a href="#">2012</a> | 11C-PK11195        | n      |                           | HC Children | 10           | 8.8         | 5/5           |
|                            |                      |                    |        |                           | HC Adults   | 15           | 29          | 7/8           |
| Schuitmaker et al.         | <a href="#">2012</a> | 11C-PK11195        | n      |                           | HC          | 35           | 53.4        | 22/13         |
| Hshieh et al.              | <a href="#">2019</a> | 11C-PRB28          | n      |                           | HC          | 65           | 75          | 18/47         |
| Katsumi et al.             | <a href="#">2020</a> | 11C-PBR28          | n      |                           | HC          | 36           | 74.4        | 6/30          |
| Toppala et al.             | <a href="#">2021</a> | 11C-PBR28          | y      | 11C-PIB                   | HC          | 54           | 70          | 24/40         |
| <b>Alzheimer's Disease</b> |                      |                    |        |                           |             |              |             |               |
| Groom et al.               | <a href="#">1995</a> | 11C-PK11195        | n      | 18F-FDG                   | AD          | 8            | n.p.        | 3/5           |
| Cagnin et al.              | <a href="#">2001</a> | 11C-PK11195        | n      |                           | HC          | 15           | 57          | 8/7           |
|                            |                      |                    |        |                           | AD          | 8            | 63.5        | 4/4           |
| Versijpt et al.            | <a href="#">2003</a> | 123I-PK11195       | n      |                           | HC          | 9            | 67          | 6/3           |
|                            |                      |                    |        |                           | AD          | 10           | 77          | 4/6           |
| Kropholler et al.          | <a href="#">2007</a> | 11C-PK11195        | y      |                           | HC Young    | 10           | 30          | 7/3           |
|                            |                      |                    |        |                           | HC Old      | 10           | 70          | 6/4           |
|                            |                      |                    |        |                           | MCI         | 10           | 74          | 6/4           |
|                            |                      |                    |        |                           | AD          | 9            | 71          | 6/3           |
| Edison et al.              | <a href="#">2008</a> | 11C-PK11195        | n      | 11C-PIB                   | HC          | 10           | 64.2        | 6/4           |
|                            |                      |                    |        |                           | AD          | 13           | 65.6        | 8/5           |
| Tomasì et al.              | <a href="#">2008</a> | 11C-PK11195        | n      |                           | HC          | 10           | n.p.        | n.p.          |
|                            |                      |                    |        |                           | AD          | 10           | n.p.        | n.p.          |
| Okello et al.              | <a href="#">2009</a> | 11C-PK11195        | n      | 11C-PIB                   | HC          | 10           | 60.2        | 6/4           |
|                            |                      |                    |        |                           | MCI         | 14           | 66.6        | 9/5           |
|                            |                      |                    |        |                           | AD          | 22           | 64.9        | 11/10         |
| Wiley et al.               | <a href="#">2009</a> | 11C-PK11195        | n      | 11C-PIB                   | HC          | 5            | 72          | 3/2           |
|                            |                      |                    |        |                           | MCI         | 6            | 71.8        | 4/2           |
|                            |                      |                    |        |                           | AD          | 6            | 76.5        | 4/2           |
| Gulyás et al.              | <a href="#">2011</a> | 11C-Vinpocetine    | n      | 11C-PIB, 18F-FDG          | HC Young    | 6            | 34.8        | 3/3           |
|                            |                      |                    |        |                           | HC Old      | 6            | 67.3        | 3/3           |
|                            |                      |                    |        |                           | AD          | 6            | 73.4        | 3/3           |
| Yokokura et al.            | <a href="#">2011</a> | 11C-PK11195        | n      | 11C-PIB, 18F-FDG          | AD          | 11           | 70.6        | 6/5           |
| Kim et al.                 | <a href="#">2013</a> | 11C-PBR28          | n      |                           | HC          | 7            | 68          | 1/6           |
|                            |                      |                    |        |                           | SCD         | 6            | 70          | 2/4           |
|                            |                      |                    |        |                           | MCI         | 7            | 73          | 4/3           |
|                            |                      |                    |        |                           | AD          | 6            | 73          | 2/4           |
| Kreisl et al.              | <a href="#">2013</a> | 11C-PBR28          | y      | 11C-PIB                   | HC          | 13           | 62.9        | 9/4           |
|                            |                      |                    |        |                           | MCI         | 10           | 72.6        | 6/4           |
|                            |                      |                    |        |                           | AD          | 19           | 63.1        | 11/8          |

|                     |                      |             |   |                                       |                 |    |      |       |
|---------------------|----------------------|-------------|---|---------------------------------------|-----------------|----|------|-------|
| Schuitemaker et al. | <a href="#">2013</a> | 11C-PK11195 | n |                                       | HC              | 21 | 68   | 13/8  |
|                     |                      |             |   |                                       | MCI             | 10 | 72   | 7/3   |
|                     |                      |             |   |                                       | AD              | 19 | 69   | 11/8  |
| Fan et al.          | <a href="#">2015</a> | 11C-PK11195 | n | 11C-PIB, 18F-FDG                      | HC              | 14 | 65   | 7/9   |
|                     |                      |             |   |                                       | AD              | 8  | 66   | 3/5   |
| Fan et al.          | <a href="#">2015</a> | 11C-PK11195 | n | 11C-PIB, 18F-FDG                      | HC              | 16 | 65.5 | 8/8   |
|                     |                      |             |   |                                       | MCI             | 10 | 67.7 | 5/5   |
|                     |                      |             |   |                                       | AD              | 10 | 66.3 | 4/6   |
|                     |                      |             |   |                                       | PDD             | 11 | 68.4 | 7/4   |
| Golla et al.        | <a href="#">2015</a> | 18F-DPA714  | y |                                       | HC              | 6  | 64.5 | 1/5   |
|                     |                      |             |   |                                       | AD              | 9  | 71.8 | 5/4   |
| Lyou et al.         | <a href="#">2015</a> | 11C-PBR28   | y |                                       | HC              | 21 | 55.1 | 15/6  |
|                     |                      |             |   |                                       | MCI             | 11 | 72.2 | 7/4   |
|                     |                      |             |   |                                       | AD              | 25 | 63   | 11/14 |
| Suridjan et al.     | <a href="#">2015</a> | 18F-FEPPA   | y |                                       | HC              | 21 | 61.3 | 9/12  |
|                     |                      |             |   |                                       | AD              | 21 | 68.3 | 11/10 |
| Ramanan et al.      | <a href="#">2015</a> | 11C-PBR28   | n | 18F-Florbetapir                       | HC              | 7  | 70.6 | 8/17  |
|                     |                      |             |   |                                       | SCD             | 5  |      |       |
|                     |                      |             |   |                                       | MCI             | 7  |      |       |
|                     |                      |             |   |                                       | AD              | 6  |      |       |
| Varrone et al.      | <a href="#">2015</a> | 18F-FEMPA   | y | 3H-PK11195                            | HC              | 7  | 63.7 | 3/4   |
|                     |                      |             |   |                                       | AD              | 10 | 66.9 | 5/5   |
| Golla et al.        | <a href="#">2016</a> | 18F-DPA714  | y |                                       | HC              | 6  | 64.5 | 1/5   |
|                     |                      |             |   |                                       | AD              | 9  | 73.7 | 5/4   |
| Kreisl et al.       | <a href="#">2016</a> | 11C-PBR28   | y | 11C-PIB                               | HC              | 8  | 61.6 | 6/2   |
|                     |                      |             |   |                                       | AD              | 14 | 65.5 | 6/8   |
| Fan et al.          | <a href="#">2017</a> | 11C-PK11195 | n | 11C-PIB                               | HC              | 8  | 65.5 | 4/4   |
|                     |                      |             |   |                                       | MCI             | 8  | 67.7 | 4/4   |
| Kreisl et al.       | <a href="#">2017</a> | 11C-PBR28   | n | 11C-PIB                               | AD              | 1  | 66   | w     |
| Kreisl et al.       | <a href="#">2017</a> | 11C-PBR28   | y | 11C-PIB, 18F-FDG                      | HC              | 15 | 63.7 | 12/3  |
|                     |                      |             |   |                                       | PCA             | 11 | 64.3 | 5/6   |
|                     |                      |             |   |                                       | AD              | 11 | 65.6 | 6/5   |
| Mabrouk et al.      | <a href="#">2017</a> | 18F-FEPPA   | y |                                       | HC              | 39 | n.p. | n.p.  |
|                     |                      |             |   |                                       | AD              | 18 | n.p. | n.p.  |
|                     |                      |             |   |                                       | PD              | 16 | n.p. | n.p.  |
| Parbo et al.        | <a href="#">2017</a> | 11C-PK11195 | n | 11C-PIB                               | HC              | 15 | 68.3 | 6/9   |
|                     |                      |             |   |                                       | MCI A $\beta$ - | 16 | 65.8 | 7/9   |
|                     |                      |             |   |                                       | MCI A $\beta$ + | 26 | 73.3 | 17/9  |
| Dani et al.         | <a href="#">2018</a> | 11C-PBR28   | y | 18F-Flutemetamol,<br>18F-Flortaucipir | HC              | 19 | 64.2 | n.p.  |
|                     |                      |             |   |                                       | MCI A $\beta$ - | 7  | 68.7 | n.p.  |
|                     |                      |             |   |                                       | MCI A $\beta$ + | 9  | 76.6 | n.p.  |
|                     |                      |             |   |                                       | AD              | 16 | 73.7 | n.p.  |
| Fan et al.          | <a href="#">2018</a> | 11C-PBR28   | y | 18F-Flutemetamol                      | HC              | 9  | 65.4 | n.p.  |
|                     |                      |             |   |                                       | MCI             | 13 | 70.9 | n.p.  |

|                   |                      |             |   |                                 |                       |    |       |       |
|-------------------|----------------------|-------------|---|---------------------------------|-----------------------|----|-------|-------|
| Knezevic et al.   | <a href="#">2018</a> | 18F-FEPPA   | y | 11C-PIB                         | HC                    | 14 | 67.1  | 5/9   |
|                   |                      |             |   |                                 | MCI                   | 11 | 71.9  | 5/6   |
| Hamelin et al.    | <a href="#">2018</a> | 18F-DPA714  | n | 11C-PIB                         | HC                    | 17 | 69.4  | n.p.  |
|                   |                      |             |   |                                 | AD                    | 52 | 67    | n.p.  |
| Parbo et al.      | <a href="#">2018</a> | 11C-PK11195 | n | 11C-PIB,<br>18F-Flortaucipir    | HC                    | 20 | 67    | 12/8  |
|                   |                      |             |   |                                 | MCI/AD Low A $\beta$  | 10 | 65    | 6/4   |
|                   |                      |             |   |                                 | MCI/AD High A $\beta$ | 16 | 72    | 10/6  |
| Passamonti et al. | <a href="#">2018</a> | 11C-PK11195 | n |                                 | HC                    | 13 | 68    | 5/8   |
|                   |                      |             |   |                                 | PSP                   | 16 | 68.4  | 10/6  |
|                   |                      |             |   |                                 | AD                    | 16 | 68.7  | 9/7   |
| Femminella et al. | <a href="#">2019</a> | 11C-PBR28   | y | 18F-Flutemetamol                | HC                    | 18 | 64.3  | 7/11  |
|                   |                      |             |   |                                 | MCI                   | 37 | 71.8  | 20/17 |
| Passamonti et al. | <a href="#">2019</a> | 11C-PK11195 | n | 11C-PIB                         | HC                    | 14 | 68.3  | 6/8   |
|                   |                      |             |   |                                 | AD                    | 28 | 72.7  | 16/12 |
| Cisbani et al.    | <a href="#">2020</a> | 18F-FEPPA   | y |                                 | HC                    | 11 | 70.0  | 5/6   |
|                   |                      |             |   |                                 | MCI                   | 11 | 70.9  | 5/6   |
|                   |                      |             |   |                                 | AD                    | 10 | 65.7  | 5/5   |
| Ismail et al.     | <a href="#">2020</a> | 11C-PK11195 | n | 11C-PIB,<br>18F-Flortaucipir    | MCI Low A $\beta$     | 16 | 66    | 8/8   |
|                   |                      |             |   |                                 | MCI High A $\beta$    | 27 | 73    | 18/9  |
| Jorge et al.      | <a href="#">2020</a> | 11C-PK11195 | n | 11C-PIB                         | HC                    | 17 | 66    | 10/7  |
|                   |                      |             |   |                                 | AD                    | 20 | 65    | 10/10 |
| Lindgren et al.   | <a href="#">2020</a> | 11C-PBR28   | n |                                 | HC Twin               | 8  | 74    | n.p.  |
|                   |                      |             |   |                                 | MCI Twin              | 8  | 74    | n.p.  |
| Low et al.        | <a href="#">2020</a> | 11C-PK11195 | n | 11C-PIB                         | HC                    | 14 | 70.4  | 8/6   |
|                   |                      |             |   |                                 | AD/MCI A $\beta$ +    | 28 | 72.2  | 16/12 |
| Malpetti et al.   | <a href="#">2020</a> | 11C-PK11195 | n | 18F-Flortaucipir                | HC                    | 29 | 68.3  | 14/15 |
|                   |                      |             |   |                                 | AD/MCI A $\beta$ +    | 26 | 72.1  | 14/12 |
| Nicastro et al.   | <a href="#">2020</a> | 11C-PK11195 | n |                                 | HC                    | 24 | 70.3  | 13/11 |
|                   |                      |             |   |                                 | AD/MCI A $\beta$ +    | 28 | 71.9  | 15/13 |
| Parbo et al.      | <a href="#">2020</a> | 11C-PK11195 | n |                                 | AD/MCI                | 27 | 73.6  | 19/8  |
| Tondo et al.      | <a href="#">2020</a> | 11C-PK11195 | n | 18F-FDG                         | EOAD                  | 12 | 60.1  | 5/7   |
| Zou et al.        | <a href="#">2020</a> | 11C-PBR28   | n | 18F-Florbetaben,<br>18F-MK-6240 | HC A $\beta$ -        | 17 | 67.6  | 5/12  |
|                   |                      |             |   |                                 | HC A $\beta$ +        | 7  | 73.1  | 4/3   |
|                   |                      |             |   |                                 | MCI A $\beta$ -       | 10 | 75.8  | 7/4   |
|                   |                      |             |   |                                 | AD A $\beta$ +        | 23 | 65.8  | 20/3  |
| Klein et al.      | <a href="#">2021</a> | 11C-PBR28   | n | 18F-Florbetaben,<br>18F-MK-6240 | HC A $\beta$ -        | 16 | 67.8  | 5/11  |
|                   |                      |             |   |                                 | HC A $\beta$ +        | 6  | 71.3  | 3/3   |
|                   |                      |             |   |                                 | MCI A $\beta$ -       | 9  | 74    | 6/3   |
|                   |                      |             |   |                                 | AD A $\beta$ +        | 23 | 64.7  | 19/4  |
| Pascoal et al.    | <a href="#">2021</a> | 11C-PBR28   | n | 18F-AZD4694,<br>18F-MK-6240     | HC young              | 22 | 23    | 8/14  |
|                   |                      |             |   |                                 | HC Old                | 64 | 72    | 14/40 |
|                   |                      |             |   |                                 | MCI                   | 28 | 73    | 17/11 |
|                   |                      |             |   |                                 | AD                    | 16 | 70    | 6/10  |
| Tondo et al.      | <a href="#">2021</a> | 11C-PK11195 | n | 18F-FDG                         | MCI                   | 8  | 63.87 | 5/3   |

|                            |                      |             |   |                  |              |    |      |       |
|----------------------------|----------------------|-------------|---|------------------|--------------|----|------|-------|
| Xiang et al.               | <a href="#">2021</a> | 18F-GE180   | n | 18F-FDG          | HC           | 14 | 70.3 | 7/7   |
|                            |                      |             |   |                  | AD           | 12 | 65.6 | 4/8   |
| <b>Lewy Body Disease</b>   |                      |             |   |                  |              |    |      |       |
| Iannaccone et al.          | <a href="#">2013</a> | 11C-PK11195 | n |                  | HC           | 11 | n.p. | n.p.  |
|                            |                      |             |   |                  | LBD          | 6  | 72   | 4/2   |
|                            |                      |             |   |                  | PD           | 6  | 70.2 | 3/3   |
| Nicastro et al.            | <a href="#">2020</a> | 11C-PK11195 | n | 11C-PIB          | HC           | 20 | 71   | 10/10 |
|                            |                      |             |   |                  | LBD          | 19 | 73.5 | 15/4  |
| Mak et al.                 | <a href="#">2021</a> | 11C-PK11195 | n | 18F-Flortaucipir | LBD          | 4  | n.p. | n.p.  |
| <b>Parkinson's Disease</b> |                      |             |   |                  |              |    |      |       |
| Ouchi et al.               | <a href="#">2005</a> | 11C-PK11195 | n | 11C-CFT          | HC           | 10 | 59.6 | 4/6   |
|                            |                      |             |   |                  | PD           | 10 | 53.1 | 4/6   |
| Gerhard et al.             | <a href="#">2006</a> | 11C-PK11195 | n | 18F-Dopa         | HC           | 11 | 56.9 | 5/6   |
|                            |                      |             |   |                  | PD           | 18 | 59   | 13/5  |
| Edison et al.              | <a href="#">2013</a> | 11C-PK11195 | n | 11C-PIB, 18F-FDG | HC           | 10 | 64.2 | 6/4   |
|                            |                      |             |   |                  | PD           | 8  | 68.2 | 5/3   |
|                            |                      |             |   |                  | PDD          | 11 | 69.3 | 7/4   |
| Iannaccone et al.          | <a href="#">2013</a> | 11C-PK11195 | n |                  | HC           | 11 | n.p. | n.p.  |
|                            |                      |             |   |                  | LBD          | 6  | 72   | 4/2   |
|                            |                      |             |   |                  | PD           | 6  | 70.2 | 3/3   |
| Kobylecki et al.           | <a href="#">2013</a> | 11C-PK11195 | n |                  | HC           | 11 | 55.7 | 5/5   |
|                            |                      |             |   |                  | PD           | 9  | 60.3 | 4/5   |
|                            |                      |             |   |                  | MSA/PSP      | 11 | 63.2 | 8/3   |
| Fan et al.                 | <a href="#">2015</a> | 11C-PK11195 | n | 11C-PIB, 18F-FDG | HC           | 16 | 65.5 | 8/8   |
|                            |                      |             |   |                  | MCI          | 10 | 67.7 | 5/5   |
|                            |                      |             |   |                  | AD           | 10 | 66.3 | 4/6   |
|                            |                      |             |   |                  | PDD          | 11 | 68.4 | 7/4   |
| Jucaite et al.             | <a href="#">2015</a> | 11C-PBR28   | y | 18F-FE-PE21      | PD           | 24 | 62   | 21/3  |
| Koshimori et al.           | <a href="#">2015</a> | 18F-FEPPA   | y |                  | HC           | 16 | n.p. | n.p.  |
|                            |                      |             |   |                  | PD           | 16 | 64.3 | 11/5  |
| Mabrouk et al.             | <a href="#">2017</a> | 18F-FEPPA   | y |                  | HC           | 39 | n.p. | n.p.  |
|                            |                      |             |   |                  | AD           | 18 | n.p. | n.p.  |
|                            |                      |             |   |                  | PD           | 16 | 64.3 | 11/5  |
| Kang et al.                | <a href="#">2018</a> | 11C-PK11195 | y |                  | HC           | 19 | 56.3 | 12/7  |
|                            |                      |             |   |                  | PD           | 20 | 63.7 | 14/6  |
| Nicastro et al.            | <a href="#">2019</a> | 11C-PK11195 | n |                  | HC           | 16 | 69.7 | 8/8   |
|                            |                      |             |   |                  | PDD          | 5  | 73.4 | 5/0   |
| Jucaite et al.             | <a href="#">2021</a> | 11C-PBR28   | y |                  | MSA          | 66 | 59   | 20/46 |
|                            |                      |             |   |                  | PD           | 24 | 62   | 3/21  |
| Lavisse et al.             | <a href="#">2021</a> | 18F-DPA714  | n | 11C-PE2I         | HC           | 28 | 57.4 | 13/15 |
|                            |                      |             |   |                  | PD           | 24 | 63.5 | 16/8  |
| Mullin et al.              | <a href="#">2021</a> | 11C-PK11195 | n | 18F-Dopa         | HC           | 20 | 66.8 | 12/8  |
|                            |                      |             |   |                  | GBA carriers | 9  | 62.9 | 4/5   |

| Frontotemporal Dementia        |                      |             |   |                              |              |    |      |       |
|--------------------------------|----------------------|-------------|---|------------------------------|--------------|----|------|-------|
| Cagnin et al.                  | <a href="#">2004</a> | 11C-PK11195 | n |                              | HC           | 8  | 62   | n.p.  |
|                                |                      |             |   |                              | FTLD         | 5  | 61   | n.p.  |
| Kim et al.                     | <a href="#">2019</a> | 11C-PBR28   | y | 11C-PIB, 18F-FDG             | HC           | 22 | 54.4 | 15/7  |
|                                |                      |             |   |                              | FTLD         | 4  | 54.3 | 3/1   |
| Walterfang et al.              | <a href="#">2020</a> | 11C-PK11195 | n |                              | HC           | 9  | 32   | 4/5   |
|                                |                      |             |   |                              | NPC          | 9  | 32   | 4/5   |
| Bevan-Jones et al.             | <a href="#">2020</a> | 11C-PK11195 | n | 18F-Flortaucipir             | HC           | 15 | 69   | 7/8   |
|                                |                      |             |   |                              | nfvPPA       | 10 | 71   | 3/7   |
|                                |                      |             |   |                              | svPPA        | 11 | 68   | 9/2   |
|                                |                      |             |   |                              | bvPPA        | 10 | 60   | 5/5   |
| Malpetti et al.                | <a href="#">2021</a> | 11C-PK11195 | n | 18F-Flortaucipir             | HC           | 15 | 68.8 | 7/8   |
|                                |                      |             |   |                              | FTD          | 7  | 59.3 | 3/4   |
| Pascual et al.                 | <a href="#">2021</a> | 11C-PBR28   | y | 11C-PIB,<br>18F-Flortaucipir | HC           | 12 | 68.9 | 6/6   |
|                                |                      |             |   |                              | svPPA        | 8  | 66.3 | 3/5   |
| Corticobasal Degeneration      |                      |             |   |                              |              |    |      |       |
| Gerhard et al.                 | <a href="#">2004</a> | 11C-PK11195 | n |                              | HC           | 5  | 61   | 1/4   |
|                                |                      |             |   |                              | CBD          | 4  | 70   | 2/2   |
| Progressive Supranuclear Palsy |                      |             |   |                              |              |    |      |       |
| Gerhard et al.                 | <a href="#">2006</a> | 11C-PK11195 | n |                              | HC           | 7  | 62   | 3/4   |
|                                |                      |             |   |                              | PSP          | 4  | 66   | 2/2   |
| Passamonti et al.              | <a href="#">2018</a> | 11C-PK11195 | n | 11C-PIB                      | HC           | 13 | 68   | 5/8   |
|                                |                      |             |   |                              | PSP          | 16 | 68.7 | 10/6  |
|                                |                      |             |   |                              | AD           | 16 | 68.7 | 9/7   |
| Malpetti et al.                | <a href="#">2020</a> | 11C-PK11195 | n | 18F-Flortaucipir             | HC           | 16 | n.p. | n.p.  |
|                                |                      |             |   |                              | PSP          | 17 | 68.3 | 10/7  |
| Malpetti et al.                | <a href="#">2021</a> | 11C-PK11195 | n | 18F-Flortaucipir             | PSP          | 17 | 68.3 | 10/7  |
| Amyotrophic Lateral Sclerosis  |                      |             |   |                              |              |    |      |       |
| Turner et al.                  | <a href="#">2004</a> | 11C-PK11195 | n |                              | HC           | 14 | 58   | 9/5   |
|                                |                      |             |   |                              | ALS          | 10 | 50   | 6/4   |
| Zurcher et al.                 | <a href="#">2015</a> | 11C-PBR28   | n |                              | HC           | 10 | 51.1 | 6/4   |
|                                |                      |             |   |                              | ALS          | 10 | 53.2 | 7/3   |
| Paganoni et al.                | <a href="#">2018</a> |             | n |                              | HC           | 10 | 54   | 5/5   |
|                                |                      |             |   |                              | PLS          | 10 | 61.8 | 7/3   |
| Alshikho et al.                | <a href="#">2018</a> | 11C-PBR28   | n |                              | HC           | 21 | 47   | 12/9  |
|                                |                      |             |   |                              | ALS          | 53 | 53.1 | 21/32 |
|                                |                      |             |   |                              | PLS          | 11 | 62.4 | 7/4   |
| Ratai et al.                   | <a href="#">2018</a> | 11C-PBR28   | n |                              | ALS          | 40 | 54   | 37/17 |
| Paganoni et al.                | <a href="#">2019</a> | 11C-PBR28   | n |                              | ALS          | 16 | 52.9 | 8/8   |
| Tondo et al.                   | <a href="#">2020</a> | 11C-PK11195 | n |                              | HC           | 10 | 44.2 | 4/6   |
|                                |                      |             |   |                              | ALS carriers | 4  | 48   | 1/3   |
|                                |                      |             |   |                              | ALS          | 6  | 61.2 | 1/5   |

|                               |                      |             |   |                |             |    |       |       |      |     |
|-------------------------------|----------------------|-------------|---|----------------|-------------|----|-------|-------|------|-----|
| Van Weehaeghe et al.          | <a href="#">2020</a> | 18F-DPA714  | y |                | HC          | 8  | 52.1  | 3/5   |      |     |
|                               |                      |             |   |                | ALS         | 7  | 58.9  | 5/2   |      |     |
|                               |                      |             |   |                | 11C-PBR28   | n  | HC    | 7     | 54.6 | 4/3 |
|                               |                      |             |   |                | ALS         |    | 7     | 53.4  | 5/2  |     |
| Babu et al.                   | <a href="#">2021</a> | 11C-PBR28   | n |                | ALS         | 22 | n.p.  | n.p.  |      |     |
| Makary et al.                 | <a href="#">2021</a> | 11C-PBR28   | n |                | ALS         | 28 | 51    | 15/13 |      |     |
| <b>Huntington Disease</b>     |                      |             |   |                |             |    |       |       |      |     |
| Pavese et al.                 | <a href="#">2006</a> | 11C-PK11195 | n | 11C-Raclopride | HC          | 10 | 47.4  | 5/5   |      |     |
|                               |                      |             |   |                | HD          | 11 | 47.9  | 7/4   |      |     |
| Tai et al.                    | <a href="#">2007</a> | 11C-PK11195 | n | 11C-Raclopride | HD carriers | 11 | 42.2  | 5/6   |      |     |
| Politis et al.                | <a href="#">2008</a> | 11C-PK11195 | n | 11C-Raclopride | HD carriers | 10 | 41.9  | 5/5   |      |     |
|                               |                      |             |   |                | HD          | 9  | 46.8  | 4/5   |      |     |
| Politis et al.                | <a href="#">2011</a> | 11C-PK11195 | n | 11C-Raclopride | HC          | 16 | 46    | 14/2  |      |     |
|                               |                      |             |   |                | HD carriers | 8  | 41    | 4/4   |      |     |
|                               |                      |             |   |                | HD          | 8  | 48    | 4/4   |      |     |
| Politis et al.                | <a href="#">2015</a> | 11C-PK11195 | n |                | HC          | 12 | 39.4  | 7/5   |      |     |
|                               |                      |             |   |                | HD carriers | 12 | 41.1  | 5/7   |      |     |
| Lois et al.                   | <a href="#">2018</a> | 11C-PBR28   | n |                | HC          | 6  | 57.8  | 2/4   |      |     |
|                               |                      |             |   |                | HD Carrier  | 1  | 38    | M     |      |     |
|                               |                      |             |   |                | HD          | 7  | 56    | 5/2   |      |     |
| Rocha et al.                  | <a href="#">2021</a> | 11C-ER176   | n |                | HC          | 6  | 43.28 | 1/5   |      |     |
|                               |                      |             |   |                | HD carriers | 6  | 38.15 | 2/4   |      |     |
|                               |                      |             |   |                | HD          | 6  | 50.75 | 0/6   |      |     |
| <b>Traumatic Brain Injury</b> |                      |             |   |                |             |    |       |       |      |     |
| Folkersma et al.              | <a href="#">2011</a> | 11C-PK11195 | n |                | HC          | 7  | n.p.  | 4/3   |      |     |
|                               |                      |             |   |                | TBI         | 8  | 40.5  | 5/3   |      |     |
| Ramlackhansingh et al.        | <a href="#">2011</a> | 11C-PK11195 | n |                | TBI         | 10 | 43    | 9/1   |      |     |
| Scott et al.                  | <a href="#">2018</a> | 11C-PBR28   | y |                | HC          | 28 | 40.8  | 23/5  |      |     |
|                               |                      |             |   |                | TBI         | 15 | 42.3  | 13/2  |      |     |
| Marklund et al.               | <a href="#">2021</a> | 11C-PK11195 | n | 18F-THK5317    | HC          | 9  | 26    | 4/5   |      |     |
|                               |                      |             |   |                | rSRC        | 12 | 26    | 6/6   |      |     |
|                               |                      |             |   |                | TBI         | 6  | 27    | 4/2   |      |     |

AD: Alzheimer's Disease, A $\beta$ : Amyloid beta, ALS: Amyotrophic lateral sclerosis, A-line: Arterial line, bvPPA: Behavioral variant primary progressive aphasia, CBD: Corticobasal degeneration, FTL: Frontotemporal lobar degeneration, GBA: Glucocerebrosidase gene mutation, HC: Healthy Control, HD: Huntington Disease, LBD: Lewy Body Disease, MCI: Mild cognitive impairment, N: Number, NPC: Niemann-Pick type C disease, MSA: Multiple system atrophy, n: No, nfvPPA: Non-fluent variant primary progressive aphasia, n.p.: no provided, PCA: Posterior cortical atrophy, PD: Parkinson's disease, PDD: Parkinson disease with dementia, PET: Positron emission tomography, PLS: Primary lateral sclerosis, PSP: Progressive supranuclear palsy, rSRC: Repeated sports-related concussions, SCD: Subjective cognitive decline, svPPA: Semantic variant primary progressive aphasia, TBI: Traumatic brain injury, PSPO: Translocator protein, y: Yes.
